# Supplementary material for: Brain blood flow pulse analysis may help to recognize individuals who suffer from hydrocephalus
Source: Springer Nature journal article supplement (doi:10.1007/s00701-023-05839-5), 2023-10-27
Supplement: MOESM1 [file 26231032]

## **SUPPLEMENTARY MATERIALS**

### **Brain blood flow pulse analysis may help to recognize individuals who suffer from hydrocephalus**

#### **Acta Neurochirurgica**

**Arkadiusz Ziolkowski<sup>1\*</sup>, Magdalena Kasproicz<sup>1</sup>, Marek Czosnyka<sup>2,3</sup>, Zofia Czosnyka<sup>2</sup>**

<sup>1</sup> Department of Biomedical Engineering, Faculty of Fundamental Problems of Technology,  
Wrocław University of Science and Technology, Wrocław, Poland

<sup>2</sup> Division of Neurosurgery, Department of Clinical Neurosciences, Addenbrooke's Hospital,  
University of Cambridge, Cambridge, United Kingdom

<sup>3</sup> Institute of Electronic Systems, Faculty of Electronics and Information Technology, Warsaw  
University of Technology, Warsaw, Poland

\* Corresponding author

e-mail: arkadiusz.ziolkowski@pwr.edu.pl

#### **Distorted pulses removing**

Based on the visual inspection of all detected pulses, the following criteria were applied to the algorithm written in Python for the automatic removal of distorted pulses: 1) pulse shorter than 0.33 s or longer than 1.5 s (outside the physiological range of pulse length), 2) appearance time of the maximum CBFV pulse greater than 0.35 s (the maximum associated with a first or second peak of the CBFV pulse should appear within 0.3 s from the beginning of the pulse [1]), 3) the last

sample of a detrended and normalized  $C_aBV$  pulse greater than 0.15 (the minimum value of the detrended  $C_aBV$  pulse is expected at the end of the pulse, otherwise the pulse is detected incorrectly), 4) maximum triangle distance between triangle and  $C_aBV$  pulse curve greater than 0.65 (high amplitude of  $C_aBV$  oscillation are not expected in the  $C_aBV$  pulse, based on the shape of the pulse observed in MRI studies [2]).

### **$C_aBV$ calculation**

To calculate  $C_aBV$  pulses from the non-invasively measured CBFV signal the constant flow forward model of cerebral blood circulation was applied [3]. The main assumptions of this model are that: 1) cerebral blood outflow ( $CBF_{out}$ ) is significantly less pulsatile than cerebral blood inflow ( $CBF_{in}$ ) [4] and therefore  $CBF_{out}$  can be approximated by the mean value of  $CBF_{in}$  over a 6 seconds window [3] (see Supplement Figure 1a); 2) cerebral blood inflow can be estimated with CBFV multiplied by cross-sectional area of insonated artery (see equations in Supplement Figure 1a,b).

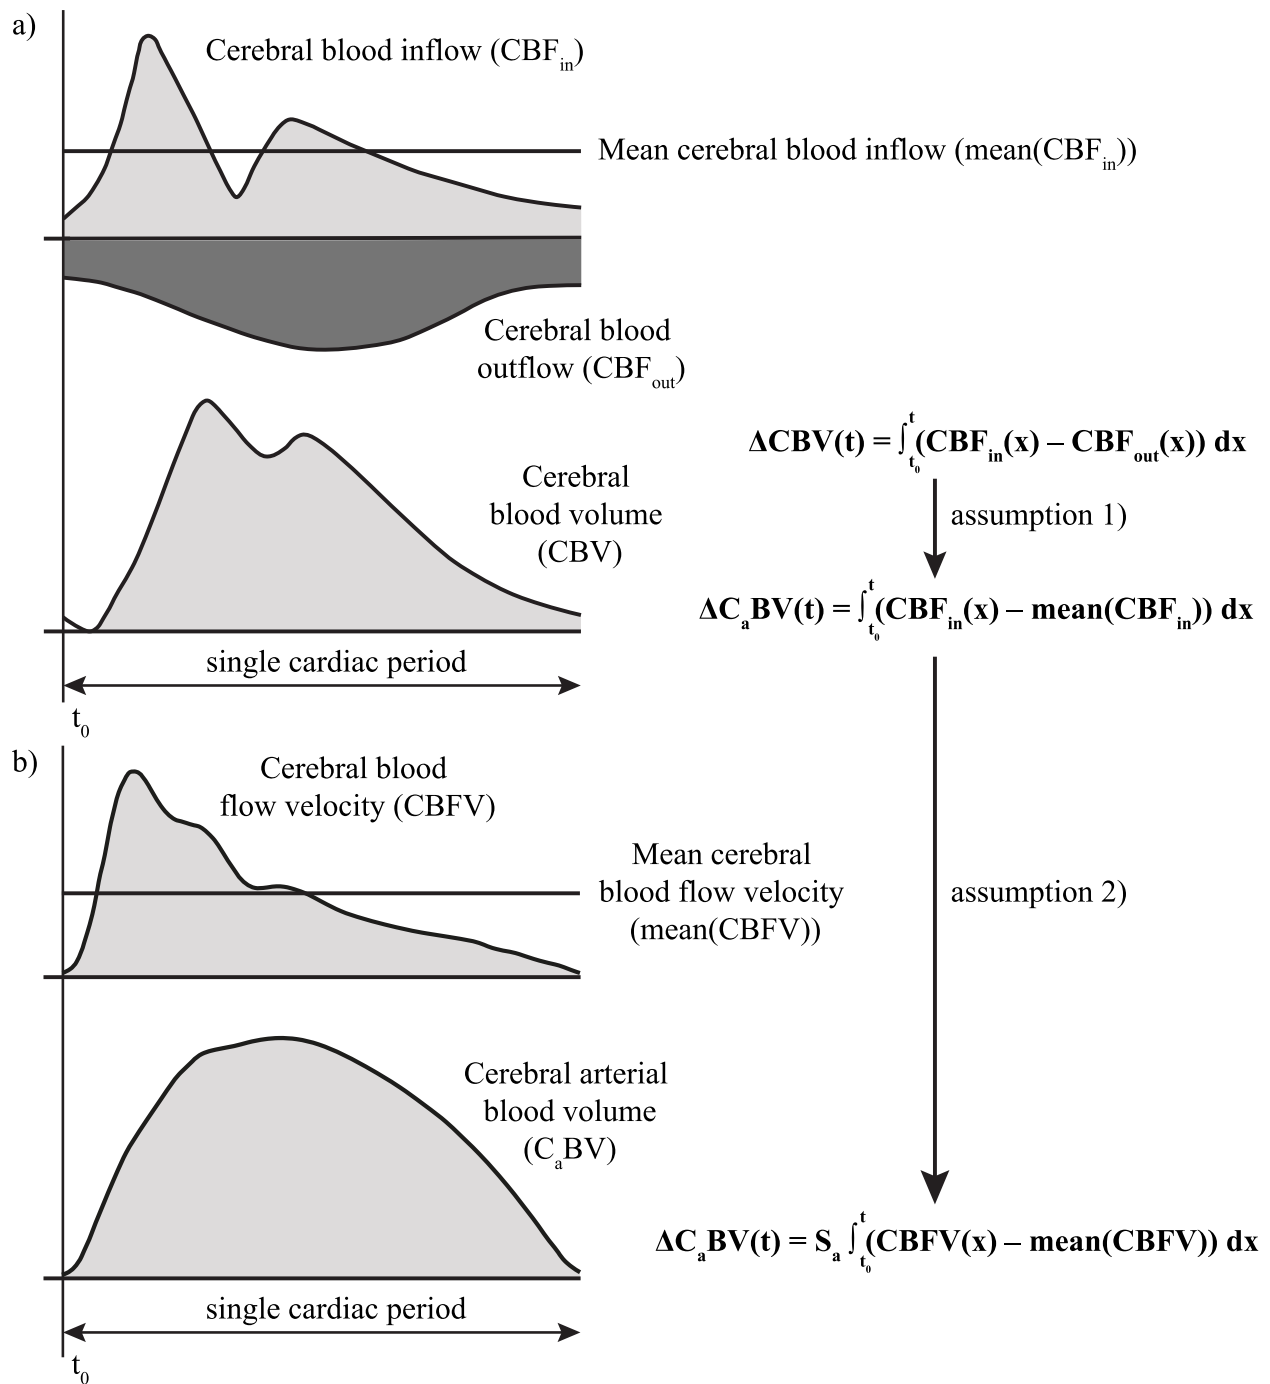

Supplement Figure 1. a): visualization of cerebral blood volume (CBV) calculated over a single cardiac cycle using invasively measured cerebral blood inflow and cerebral blood outflow (based on [4]). b): visualization of non-invasively estimated cerebral arterial blood volume ( $C_aBV$ ) using constant flow forward model and TCD cerebral blood flow velocity signal. For the description of the assumptions see the content of Supplementary material.  $t_0$  – beginning of a cardiac cycle,  $S_a$  – cross-sectional area of the insonated artery.

It was also assumed that the cross-sectional area of the insonated artery remains constant over a series of cardiac cycles [4], [5]. With these assumptions, the cross-sectional area of the insonated artery can be neglected in the equation in Figure 1b), and changes in  $C_aBV$  can be estimated using Equation (1).

$$\Delta C_aBV(t) = \int_{t_0}^t (CBFV(x) - \text{mean}(CBFV)) dx [cm] \quad (1)$$

where  $\Delta C_aBV$  is the change in cerebral arterial blood volume during a single cardiac cycle,  $t_0$  is the beginning of a single cardiac cycle,  $CBFV(x)$  is cerebral blood flow velocity at the moment  $t$  [cm/s],  $\text{mean}(CBFV)$  is a mean cerebral blood flow velocity calculated over a 6 seconds window [cm/s].

It is important to note that  $\Delta C_aBV$  calculated in this way is normalized (divided) by the unknown cross-sectional area of the vessel  $S_a$ ; therefore, units are not units of volume ( $cm^3$ ) but cm and the value of  $\Delta C_aBV$  cannot be compared between subjects. This however does not affect the shape of the  $C_aBV$  pulse, making the comparison analysis of the pulse shapes between healthy volunteers and NPH patients possible.

Supplement Table 1. List of all triangle similarity parameters that were analyzed.

| Parameter name                                                                                                                                              | Acronym | Parameter name                                                                                                                                                     | Acronym |
|-------------------------------------------------------------------------------------------------------------------------------------------------------------|---------|--------------------------------------------------------------------------------------------------------------------------------------------------------------------|---------|
| <b>Total Area</b> – sum of all areas where the $C_aBV$ pulse contour is above or below the triangle arm on both ascending and descending parts of the pulse | TA      | <b>mean Ascending Lower Distance</b> – the average distance calculated from area where the $C_aBV$ contour is below the triangle on ascending part of the pulse    | mALD    |
| <b>mean Distance</b> – the average distance calculated from all areas between $C_aBV$ pulse contour and triangle arms                                       | mD      | <b>Maximum Ascending Lower Distance</b> – the maximum distance calculated from area where the $C_aBV$ contour is below the triangle on ascending part of the pulse | MALD    |

|                                                                                                                                                                         |      |                                                                                                                                                                                |      |
|-------------------------------------------------------------------------------------------------------------------------------------------------------------------------|------|--------------------------------------------------------------------------------------------------------------------------------------------------------------------------------|------|
| <b>Maximum Distance</b> – the maximum distance from all areas between C <sub>a</sub> BV pulse contour and triangle arms                                                 | MD   | <b>Descending Upper Area</b> – the area where the C <sub>a</sub> BV contour is above the triangle on descending part of the pulse                                              | DUA  |
| <b>Upper Area</b> – sum of areas where the C <sub>a</sub> BV pulse contour is above the triangle arms                                                                   | UA   | <b>mean Descending Upper Distance</b> – the average distance calculated from area where the C <sub>a</sub> BV contour is above the triangle on descending part of the pulse    | mDUD |
| <b>mean Upper Distance</b> – the averaged distance calculated from all areas where the C <sub>a</sub> BV pulse contour is above the triangle arms                       | mUD  | <b>Maximum Descending Upper Distance</b> – the maximum distance calculated from area where the C <sub>a</sub> BV contour is above the triangle on descending part of the pulse | MDUD |
| <b>Maximum Upper Distance</b> – the maximum distance from all areas where the C <sub>a</sub> BV pulse contour is above the triangle arms                                | MUD  | <b>Descending Lower Area</b> – the area where the C <sub>a</sub> BV contour is below the triangle on descending part of the pulse                                              | DLA  |
| <b>Lower Area</b> – sum of areas where the C <sub>a</sub> BV pulse contour is below the triangle arms                                                                   | LA   | <b>mean Descending Lower Distance</b> – the average distance calculated from area where the C <sub>a</sub> BV contour is below the triangle on descending part of the pulse    | mDLD |
| <b>mean Lower Distance</b> – the averaged distance calculated from all areas where the C <sub>a</sub> BV pulse contour is below the triangle arms                       | mLD  | <b>Maximum Descending Lower Distance</b> – the maximum distance calculated from area where the C <sub>a</sub> BV contour is below the triangle on descending part of the pulse | MDLD |
| <b>Maximum Lower Distance</b> – the maximum distance from all areas where the C <sub>a</sub> BV pulse contour is below the triangle arms                                | MLD  | <b>Ascending Descending Duration Ratio</b> – the ratio of the duration of the ascending and descending part of the C <sub>a</sub> BV pulse                                     | ADDR |
| <b>Lower Upper Area Ratio</b> – the ratio of the sum of the areas where the C <sub>a</sub> BV pulse is above the arms of the triangle to the sum of the areas where the | LUAR | <b>Frechet Distance</b> – distance between C <sub>a</sub> BV pulse contour and the triangle arms calculated with the use of frechetdist 0.6 Python package, based on [6]       | FD   |

|                                                                                                                                                                              |      |                                                                                                                                                                                                        |       |
|------------------------------------------------------------------------------------------------------------------------------------------------------------------------------|------|--------------------------------------------------------------------------------------------------------------------------------------------------------------------------------------------------------|-------|
| C <sub>a</sub> BV pulse contour is below the arms of the triangle.                                                                                                           |      |                                                                                                                                                                                                        |       |
| <b>Ascending Upper Area</b> – the area where the C <sub>a</sub> BV contour is above the triangle on ascending part of the pulse                                              | AUA  | <b>Dynamic Time Wrapping Distance</b> – distance between C <sub>a</sub> BV pulse contour and the triangle arms calculated with the use of dtw-python 1.3.0 package, based on [7]                       | DTWD  |
| <b>mean Ascending Upper Distance</b> – the average distance calculated from area where the C <sub>a</sub> BV contour is above the triangle on ascending part of the pulse    | mAUD | <b>normalized Dynamic Time Wrapping Distance</b> – normalized distance between C <sub>a</sub> BV pulse contour and the triangle arms calculated with the use of dtw-python 1.3.0 package, based on [7] | nDTWD |
| <b>Maximum Ascending Upper Distance</b> – the maximum distance calculated from area where the C <sub>a</sub> BV contour is above the triangle on ascending part of the pulse | MAUD | <b>Maximum Appearance Time</b> – the time of appearance of the maximum value of the C <sub>a</sub> BV pulse                                                                                            | MAT   |
| <b>Ascending Lower Area</b> – the area where the C <sub>a</sub> BV contour is below the triangle on ascending part of the pulse                                              | ALA  |                                                                                                                                                                                                        |       |

Supplement Table 2. Medians, lower (Q1) and upper (Q3) quartiles of all triangle similarity parameters. P-values are from the Wilcoxon signed rank test. Medians and p-values above 0.05 are bolded. Parameter names are given as acronyms, see Table 1 for full names.

| Parameter | Healthy volunteers n=23 |       |       | NPH patients n=31 |       |       | p-value      |
|-----------|-------------------------|-------|-------|-------------------|-------|-------|--------------|
|           | Median                  | Q1    | Q3    | Median            | Q1    | Q3    |              |
| TA        | <b>26.45</b>            | 23.56 | 27.81 | <b>22.47</b>      | 21.42 | 27.21 | <b>0.025</b> |
| mD        | <b>0.132</b>            | 0.118 | 0.139 | <b>0.112</b>      | 0.107 | 0.136 | <b>0.025</b> |
| MD        | <b>0.290</b>            | 0.251 | 0.310 | <b>0.253</b>      | 0.215 | 0.293 | <b>0.017</b> |
| UA        | <b>26.13</b>            | 23.19 | 27.57 | <b>21.82</b>      | 20.54 | 27.08 | <b>0.017</b> |
| mUD       | <b>0.144</b>            | 0.129 | 0.150 | <b>0.130</b>      | 0.122 | 0.145 | <b>0.024</b> |
| MUD       | <b>0.289</b>            | 0.251 | 0.308 | <b>0.253</b>      | 0.215 | 0.293 | <b>0.017</b> |
| LA        | <b>0.374</b>            | 0.265 | 0.497 | <b>0.661</b>      | 0.344 | 1.296 | <b>0.005</b> |
| mLD       | <b>0.017</b>            | 0.014 | 0.021 | <b>0.026</b>      | 0.019 | 0.032 | <b>0.002</b> |
| MLD       | <b>0.033</b>            | 0.027 | 0.041 | <b>0.050</b>      | 0.036 | 0.059 | <b>0.003</b> |
| LUAR      | <b>0.017</b>            | 0.008 | 0.030 | <b>0.031</b>      | 0.016 | 0.061 | <b>0.048</b> |

|       |              |       |       |              |       |       |                 |
|-------|--------------|-------|-------|--------------|-------|-------|-----------------|
| AUA   | <b>10.47</b> | 9.775 | 14.16 | <b>6.760</b> | 5.497 | 8.870 | << <b>0.001</b> |
| mAUD  | <b>0.153</b> | 0.141 | 0.170 | <b>0.114</b> | 0.097 | 0.130 | << <b>0.001</b> |
| MAUD  | <b>0.258</b> | 0.237 | 0.296 | <b>0.183</b> | 0.152 | 0.239 | << <b>0.001</b> |
| ALA   | <b>0.314</b> | 0.200 | 0.452 | <b>0.599</b> | 0.322 | 1.241 | <b>0.002</b>    |
| mALD  | <b>0.021</b> | 0.017 | 0.025 | <b>0.031</b> | 0.023 | 0.038 | <b>0.003</b>    |
| MALD  | <b>0.033</b> | 0.026 | 0.040 | <b>0.049</b> | 0.035 | 0.059 | <b>0.002</b>    |
| DUA   | <b>13.48</b> | 12.91 | 15.08 | <b>15.04</b> | 12.96 | 17.21 | 0.157           |
| mDUD  | <b>0.128</b> | 0.119 | 0.135 | <b>0.131</b> | 0.119 | 0.143 | 0.421           |
| MUDD  | <b>0.198</b> | 0.187 | 0.213 | <b>0.214</b> | 0.186 | 0.230 | 0.151           |
| DLA   | <b>0.043</b> | 0.036 | 0.060 | <b>0.046</b> | 0.020 | 0.103 | 0.958           |
| mDLD  | <b>0.005</b> | 0.004 | 0.005 | <b>0.004</b> | 0.003 | 0.007 | 0.875           |
| MDLD  | <b>0.008</b> | 0.006 | 0.009 | <b>0.007</b> | 0.004 | 0.011 | 0.875           |
| ADDR  | <b>0.802</b> | 0.707 | 0.915 | <b>0.688</b> | 0.623 | 0.794 | <b>0.002</b>    |
| FD    | <b>0.121</b> | 0.110 | 0.140 | <b>0.127</b> | 0.104 | 0.155 | 0.916           |
| DTWD  | <b>1.277</b> | 1.227 | 1.341 | <b>1.244</b> | 1.211 | 1.443 | 0.441           |
| nDTWD | <b>0.003</b> | 0.003 | 0.003 | <b>0.003</b> | 0.003 | 0.004 | 0.441           |
| MAT   | <b>431.7</b> | 408.6 | 459.4 | <b>398.9</b> | 377.6 | 437.5 | <b>0.010</b>    |

## References:

- [1] A. Ziółkowski *et al.*, “Peak appearance time in pulse waveforms of intracranial pressure and cerebral blood flow velocity,” *Front Physiol*, vol. 13, p. 2670, Jan. 2023, doi: 10.3389/FPHYS.2022.1077966/BIBTEX.
- [2] A. Vallet *et al.*, “Biomechanical response of the CNS is associated with frailty in NPH-suspected patients,” *J Neurol*, vol. 267, no. 5, pp. 1389–1400, 2020, doi: 10.1007/s00415-019-09689-z.
- [3] D. J. Kim *et al.*, “The monitoring of relative changes in compartmental compliances of brain,” *Physiol Meas*, vol. 30, no. 7, pp. 647–659, 2009, doi: 10.1088/0967-3334/30/7/009.
- [4] C. J. J. Avezaat and J. H. M. van Eijndhoven, “The role of the pulsatile pressure variations in intracranial pressure monitoring,” *Neurosurg Rev*, vol. 9, no. 1–2, pp. 113–33, 1986, doi: 10.1007/BF01743061.
- [5] M. Tóth, G. L. Nádasy, I. Nyáry, T. Kerényi, and E. Monos, “Are there systemic changes in the arterial biomechanics of intracranial aneurysm patients?,” *Pflugers Arch*, vol. 439, no. 5, pp. 573–578, Mar. 2000, doi: 10.1007/s004249900154.
- [6] T. Eiter and H. Mannila, “Computing discrete Fréchet distance. Tech. Report CD-TR 94/64,” Vienna, 1994.
- [7] T. Giorgino, “Computing and Visualizing Dynamic Time Warping Alignments in R: The dtw Package,” *J Stat Softw*, vol. 31, no. 7, pp. 1–24, Aug. 2009, doi: 10.18637/JSS.V031.I07.
